# Supplementary material for: Five New Cucurbitane-Type Triterpenoid Glycosides from the Rhizomes of Hemsleya penxianensis with Cytotoxic Activities
Source: MDPI journal article supplement (doi:10.3390/molecules24162937), 2019-08-13
Supplement: s1 [file s1]

# Five new cucurbitane-type triterpenoid glycosides from the rhizomes of *Hemsleya penxianensis* with cytotoxic activities

De-Li Chen<sup>1, 2†</sup>, Xu-Dong Xu<sup>2†</sup>, Rong-Tao Li<sup>1</sup>, Bo-Wen Wang<sup>3</sup>, Meng Yu<sup>1,2</sup>, Yang-Yang Liu<sup>1,\*</sup>, Guo-Xu Ma<sup>1, 2,\*</sup>

<sup>1</sup> Hainan Branch of Institute of Medicinal Plant Development, Chinese Academy of Medicinal Sciences & Peking Union Medical College (Hainan Provincial Key Laboratory of Resources Conservation and Development of Southern Medicine), Haikou, China, 570311; chendeli9999@163.com;

<sup>2</sup> Institute of Medicinal Plant Development, Chinese Academy of Medical Sciences & Peking Union Medical College, No. 151, Malianwa North Road, Haidian District, Beijing, China, 100193; mgxfl8785@163.com;

<sup>3</sup> School of Chemical Engineering and Technology, Hainan University, Haikou, China, 570228 ; jasminewong@hainu.edu.cn

\* Correspondence: eadchris@163.com; mgxfl8785@163.com; Tel.: +86-010-57833296

† Contributed equally to this work.

## List of Figures S1-S29

Figure S1. <sup>1</sup>H-NMR (600 MHz, pyridine-*d*<sub>5</sub>) spectrum of the new compound **1**

Figure S2. <sup>13</sup>C-APT (150 MHz, pyridine-*d*<sub>5</sub>) spectrum of the new compound **1**

Figure S3. HSQC spectrum of the new compound **1**

Figure S4. HMBC spectrum of the new compound **1**

Figure S5. <sup>1</sup>H-<sup>1</sup>H COSY spectrum of the new compound **1**

Figure S6. NOESY spectrum of the new compound **1**

Figure S7. <sup>1</sup>H-NMR (600 MHz, pyridine-*d*<sub>5</sub>) spectrum of the new compound **2**

Figure S8. <sup>13</sup>C-APT (150 MHz, pyridine-*d*<sub>5</sub>) spectrum of the new compound **2**

Figure S9. HSQC spectrum of the new compound **2**

Figure S10. HMBC spectrum of the new compound **2**

Figure S11. NOESY spectrum of the new compound **2**

Figure S12. <sup>1</sup>H-<sup>1</sup>H COSY spectrum of the new compound **2**

Figure S13. <sup>1</sup>H-NMR (600 MHz, pyridine-*d*<sub>5</sub>) spectrum of the new compound **3**

Figure S14.  $^{13}\text{C}$ -APT (150 MHz, pyridine- $d_5$ ) spectrum of the new compound **3**

Figure S15. HMBC spectrum of the new compound **3**

Figure S16. NOESY spectrum of the new compound **3**

Figure S17.  $^1\text{H}$ - $^1\text{H}$  COSY spectrum of the new compound **3**

Figure S18.  $^1\text{H}$ -NMR (600 MHz, pyridine- $d_5$ ) spectrum of the new compound **4**

Figure S19.  $^{13}\text{C}$ -APT (150 MHz, pyridine- $d_5$ ) spectrum of the new compound **4**

Figure S20. HSQC spectrum of the new compound **4**

Figure S21. HMBC spectrum of the new compound **4**

Figure S22. NOESY spectrum of the new compound **4**

Figure S23.  $^1\text{H}$ - $^1\text{H}$  COSY spectrum of the new compound **4**

Figure S24.  $^1\text{H}$ -NMR (600 MHz, pyridine- $d_5$ ) spectrum of the new compound **5**

Figure S25.  $^{13}\text{C}$ -APT (150 MHz, pyridine- $d_5$ ) spectrum of the new compound **5**

Figure S26. HSQC spectrum of the new compound **5**

Figure S27. HMBC spectrum of the new compound **5**

Figure S28. NOESY spectrum of the new compound **5**

Figure S29.  $^1\text{H}$ - $^1\text{H}$  COSY spectrum of the new compound **5**

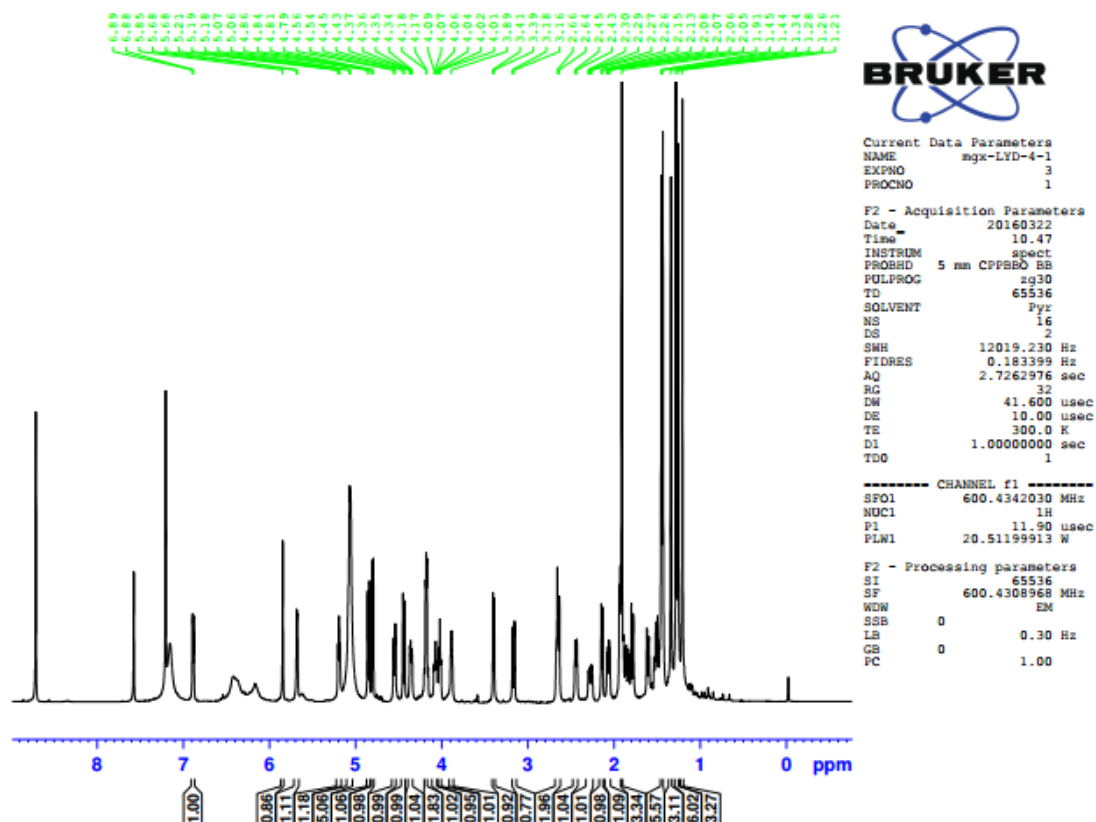

Figure S1.  $^1\text{H}$ -NMR (600 MHz, pyridine- $d_5$ ) spectrum of the new compound **1**

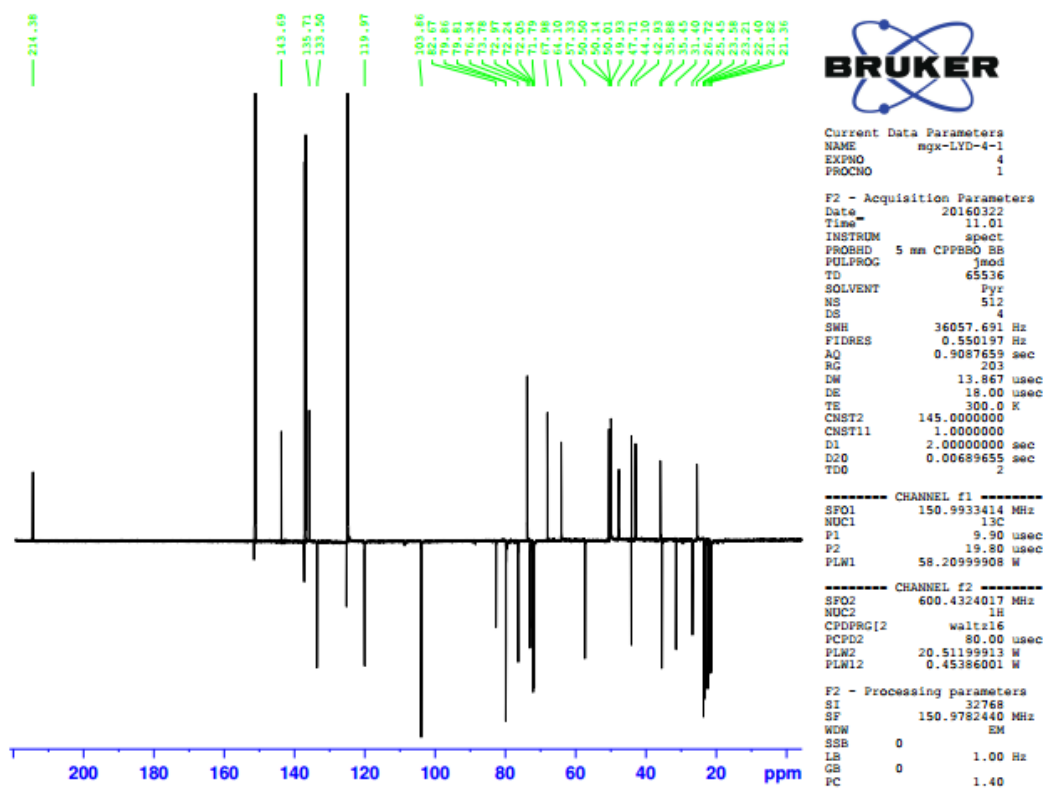

Figure S2.  $^{13}\text{C}$ -APT (150 MHz, pyridine- $d_5$ ) spectrum of the new compound **1**

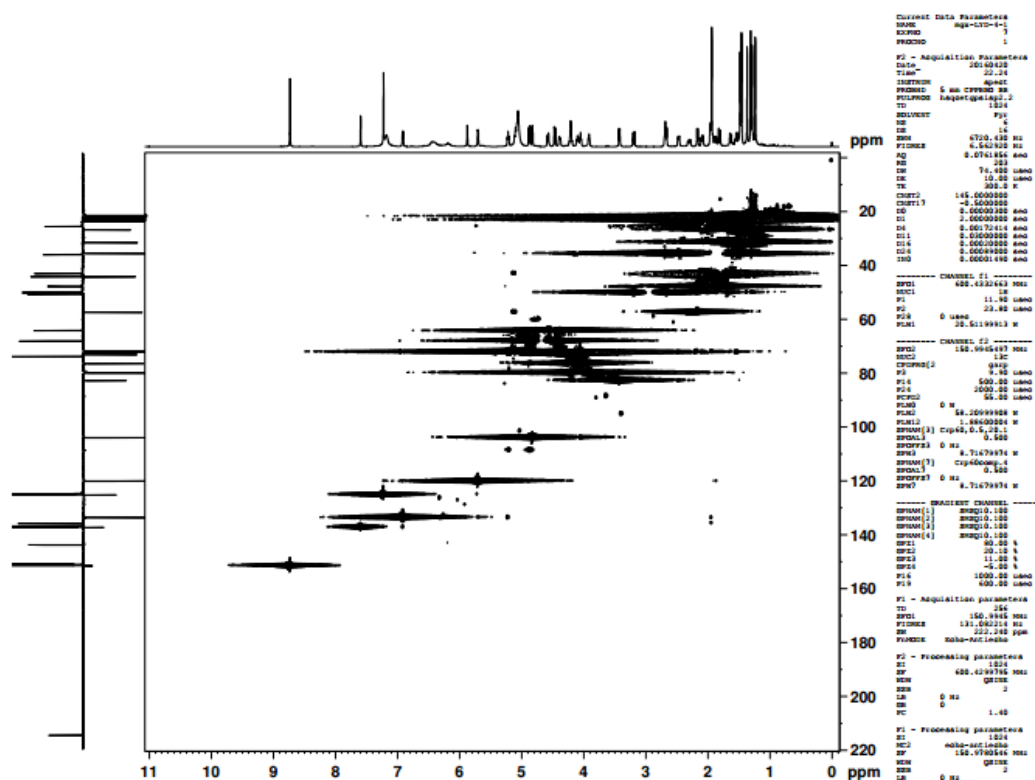

Figure S3. HSQC spectrum of the new compound 1

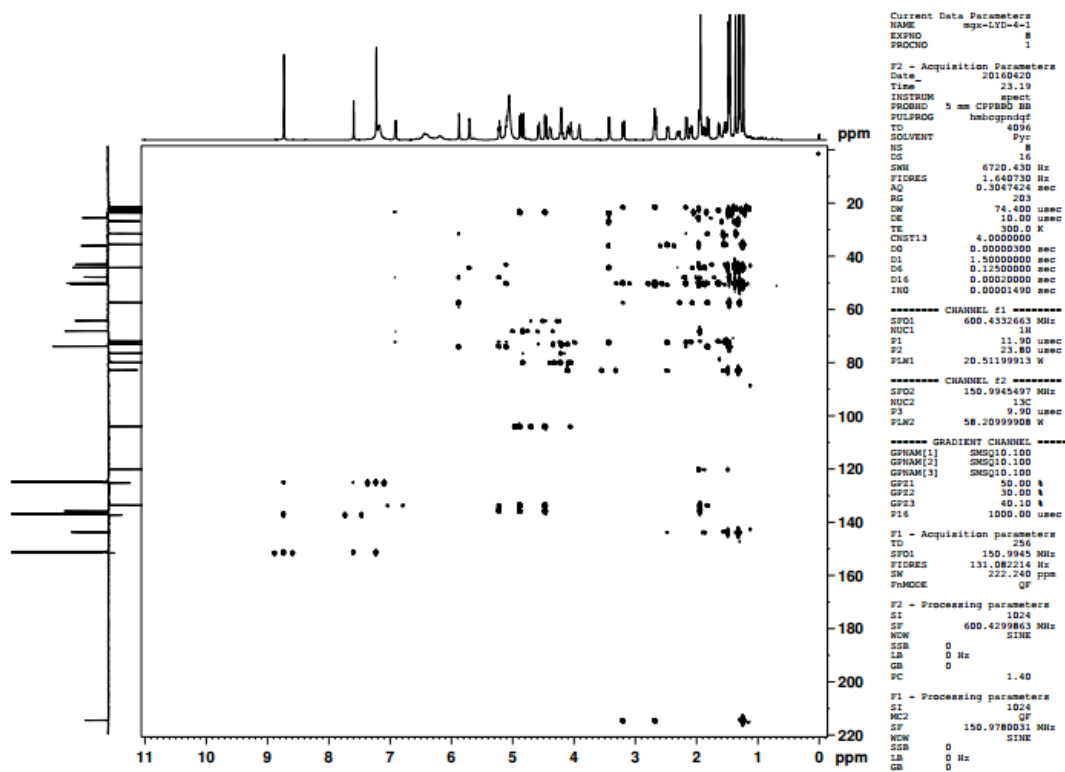

Figure S4. HMBC spectrum of the new compound 1

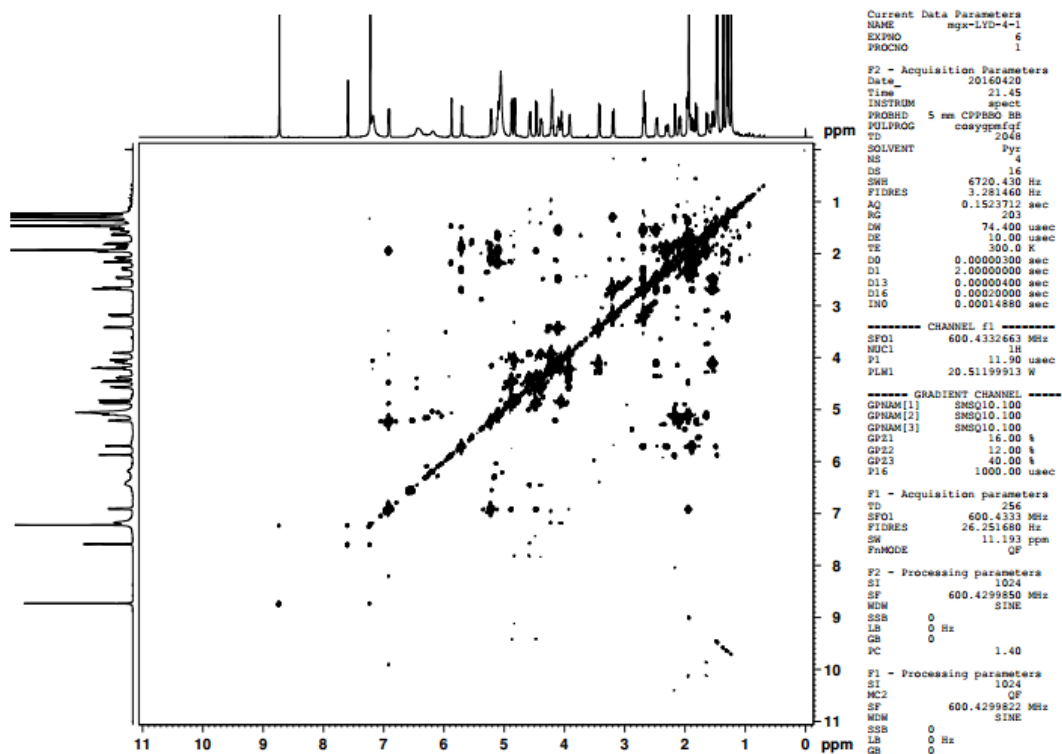

Figure S5.  $^1\text{H}$ - $^1\text{H}$  COSY spectrum of the new compound 1

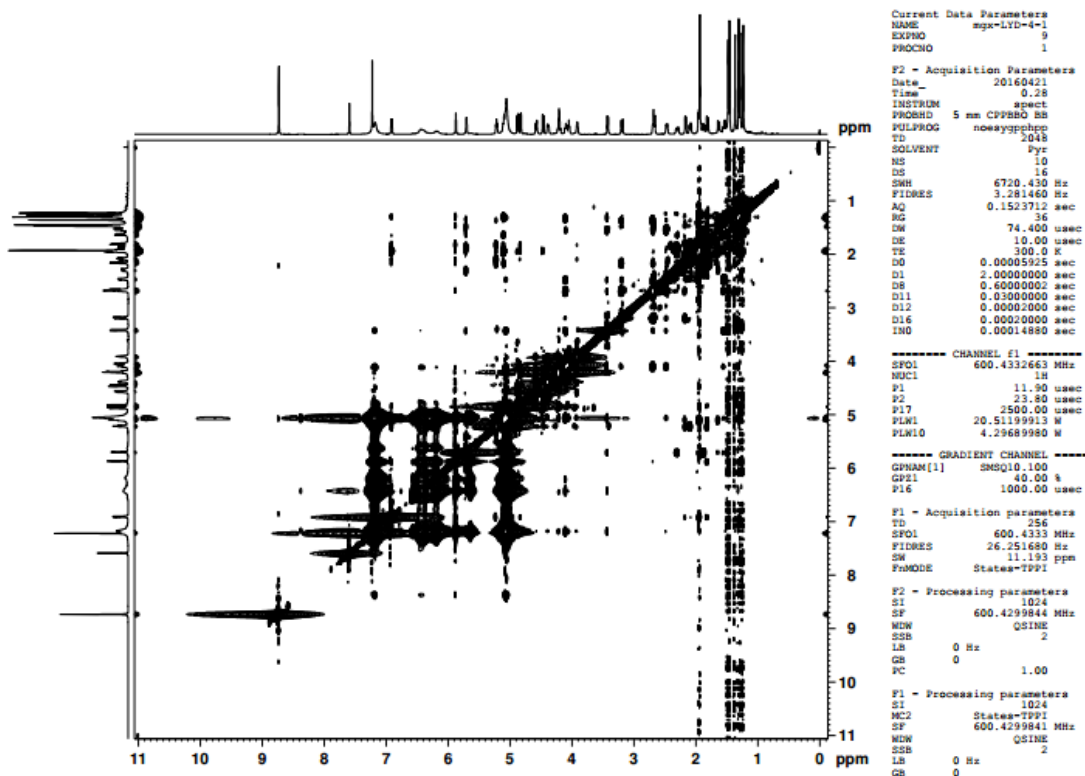

Figure S6. NOESY spectrum of the new compound 1

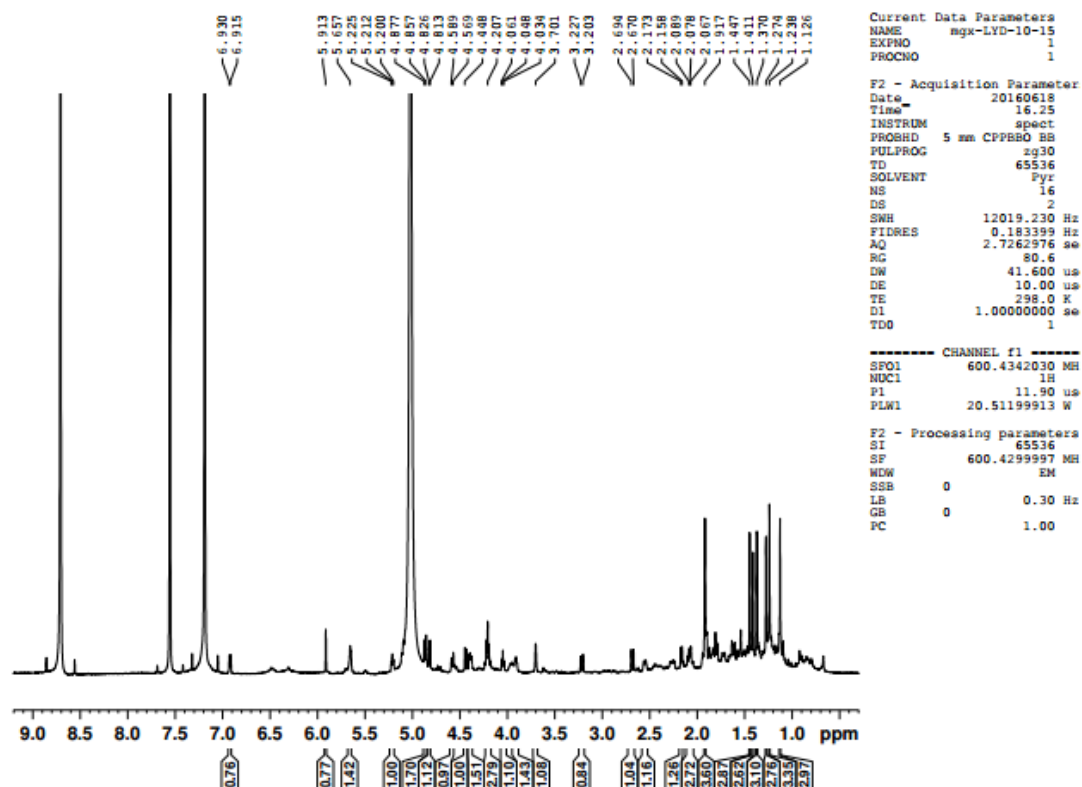

Figure S7.  $^1\text{H}$ -NMR (600 MHz, pyridine- $d_5$ ) spectrum of the new compound **2**

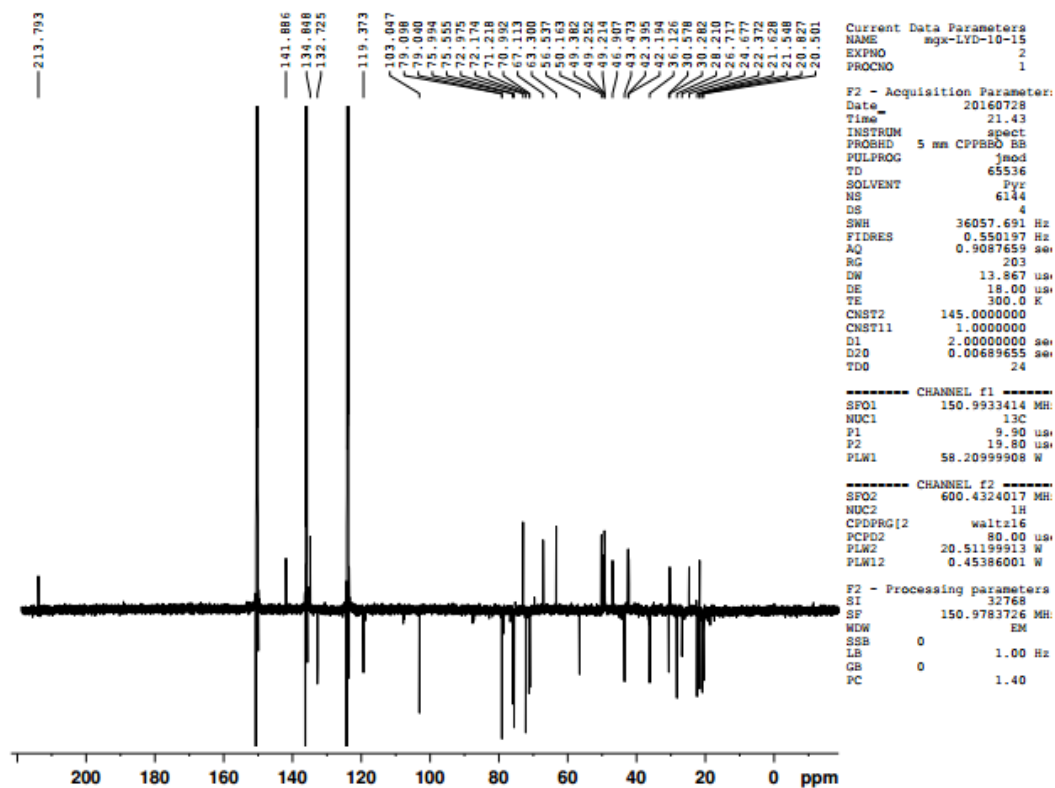

Figure S8.  $^{13}\text{C}$ -APT (150 MHz, pyridine- $d_5$ ) spectrum of the new compound **2**



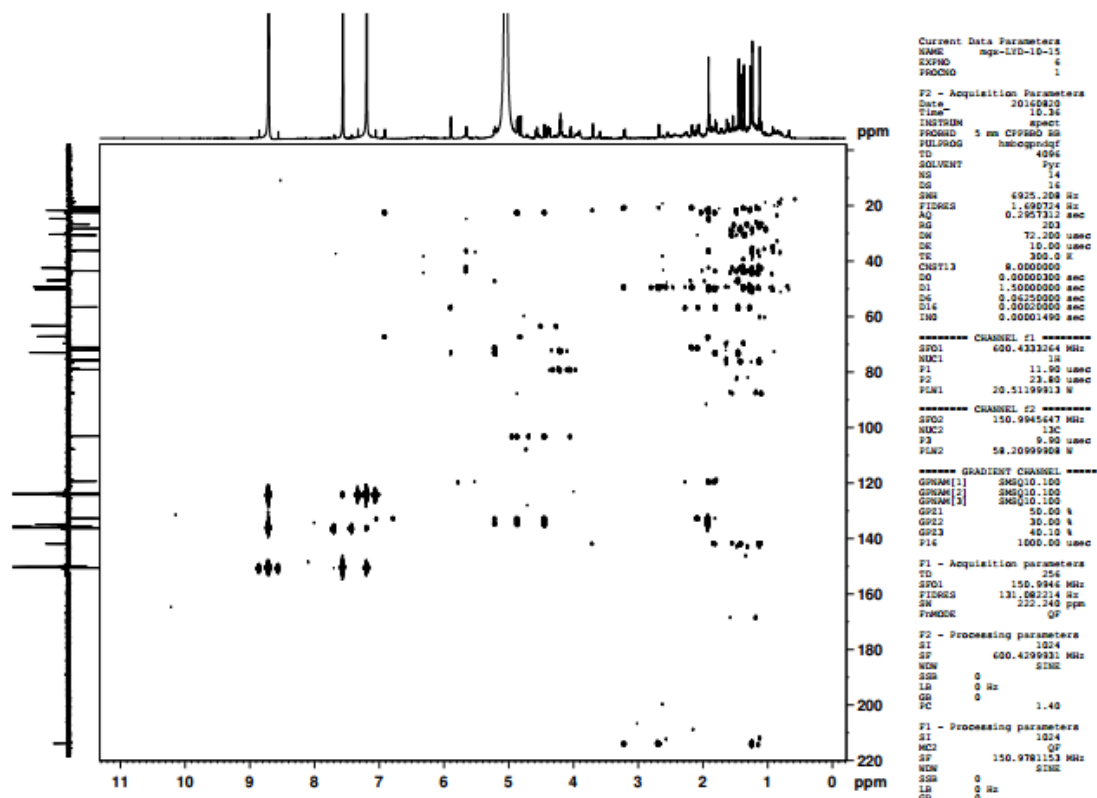

Figure S10. HMBC spectrum of the new compound 2

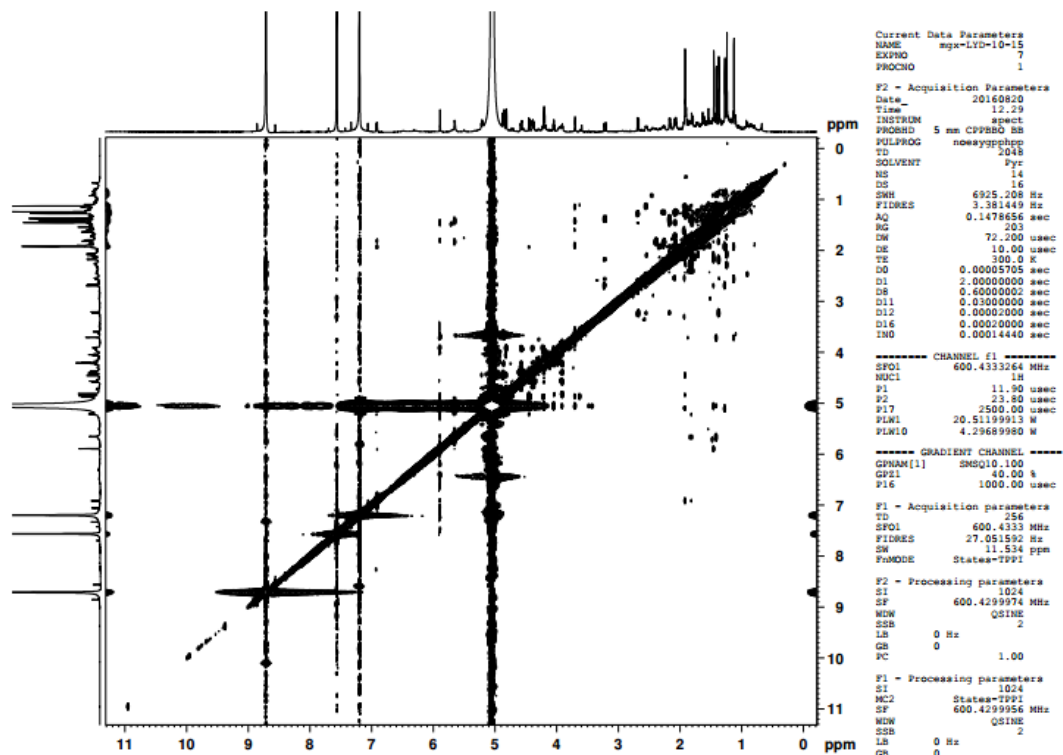

Figure S11. NOESY spectrum of the new compound 2



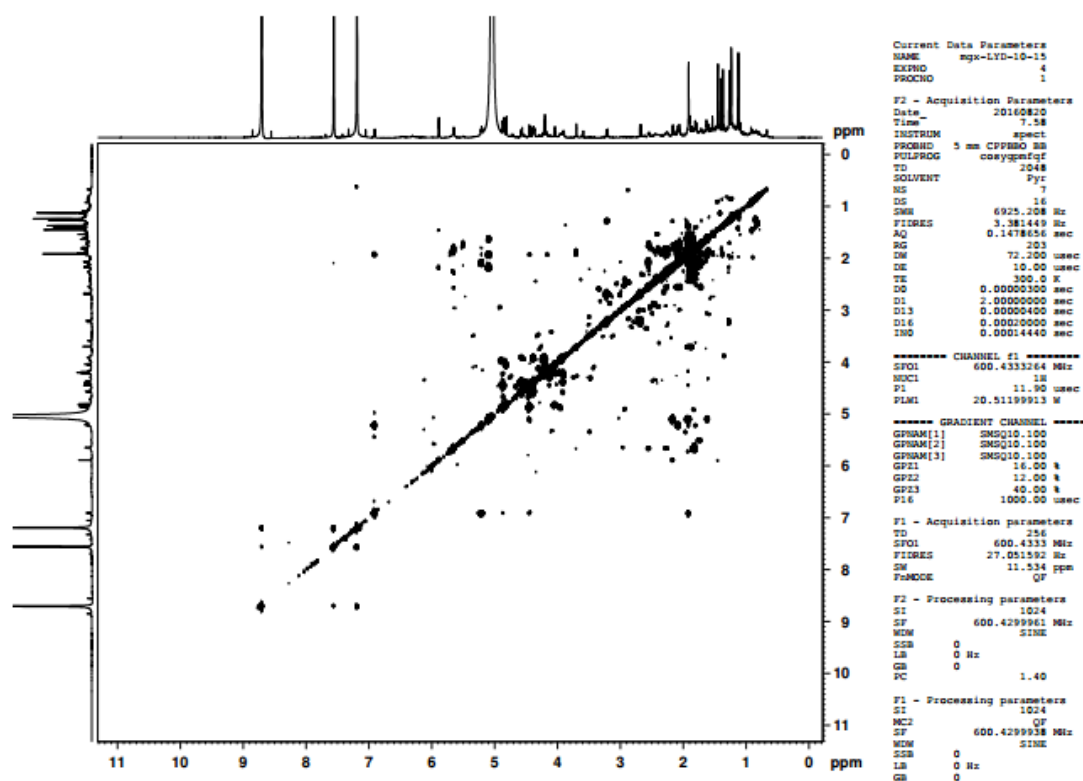

Figure S12.  $^1\text{H}$ - $^1\text{H}$  COSY spectrum of the new compound 2

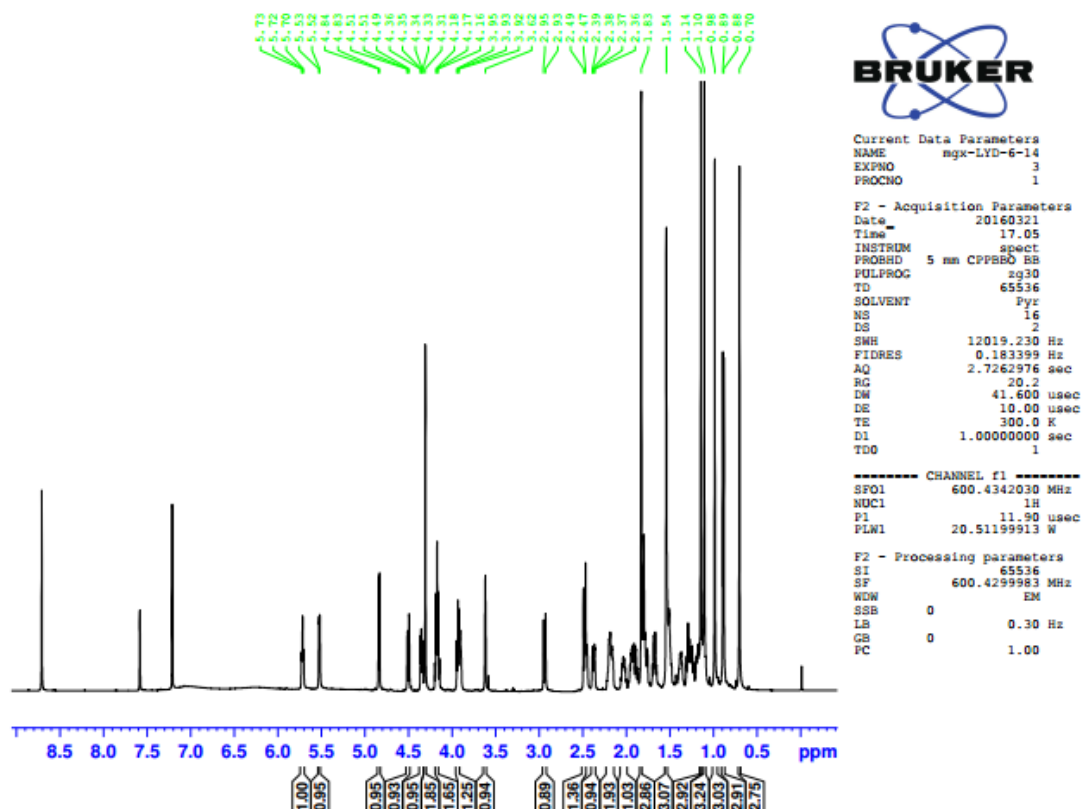

Figure S13.  $^1\text{H}$ -NMR (600 MHz, pyridine- $d_5$ ) spectrum of the new compound 3

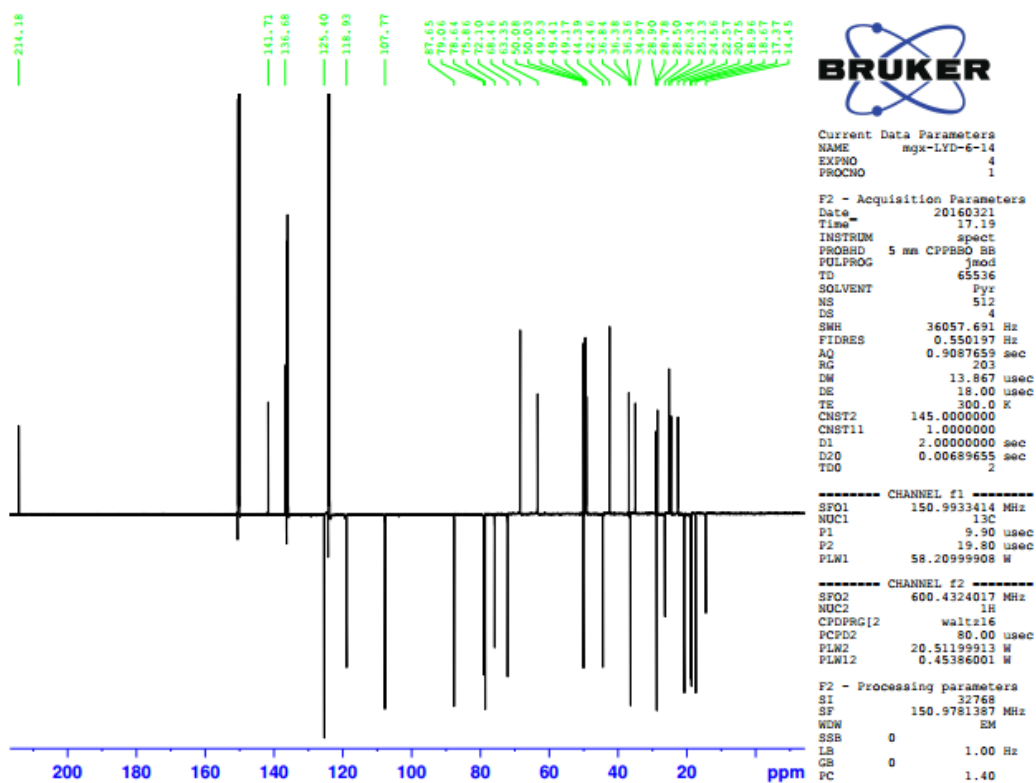

Figure S14.  $^{13}\text{C}$ -APT (150 MHz, pyridine- $d_5$ ) spectrum of the new compound 3

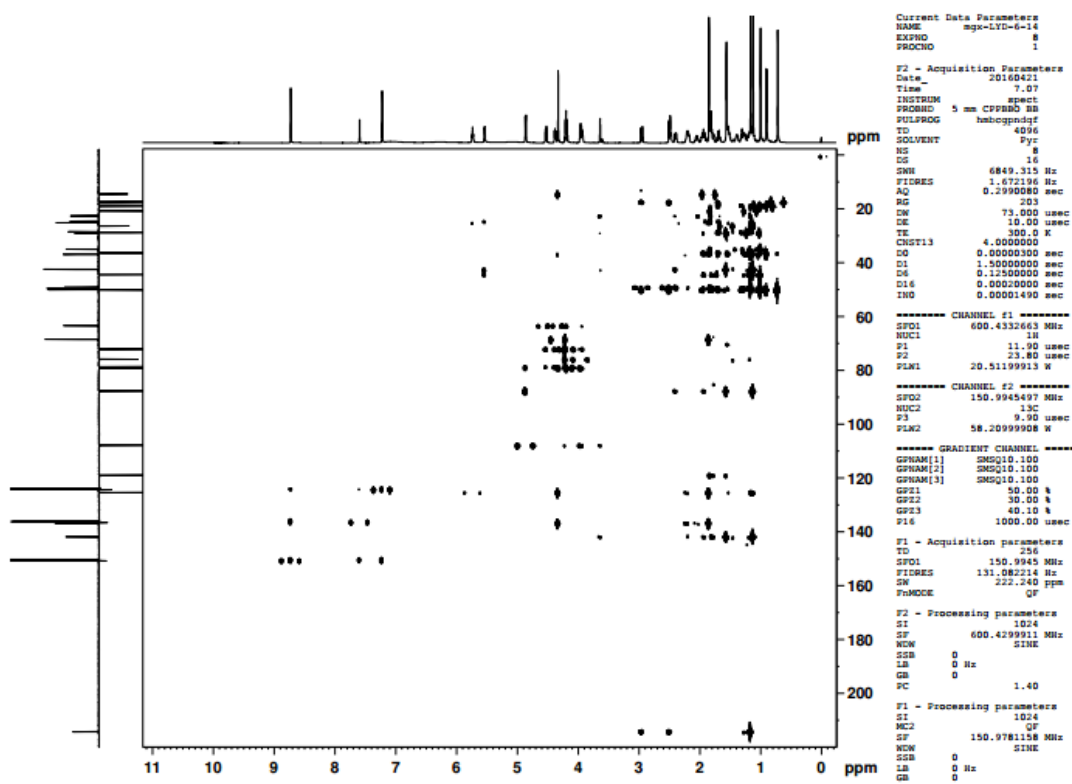

Figure S15. HMBC spectrum of the new compound 3

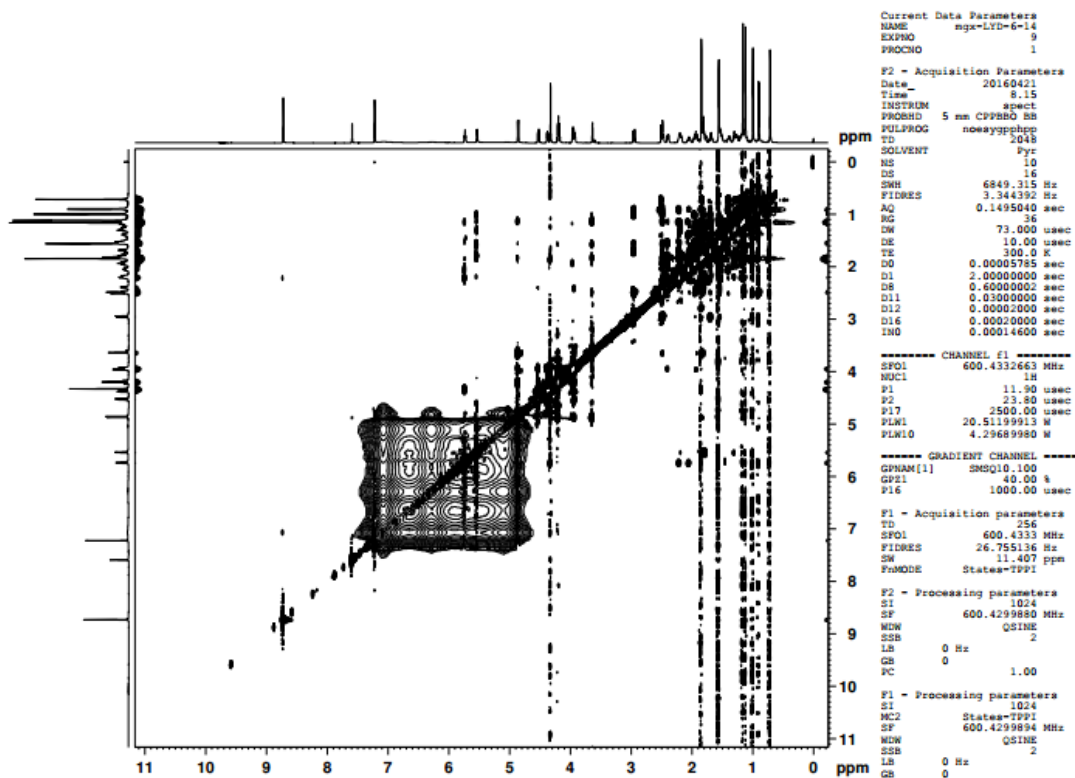

Figure S16. NOESY spectrum of the new compound 3

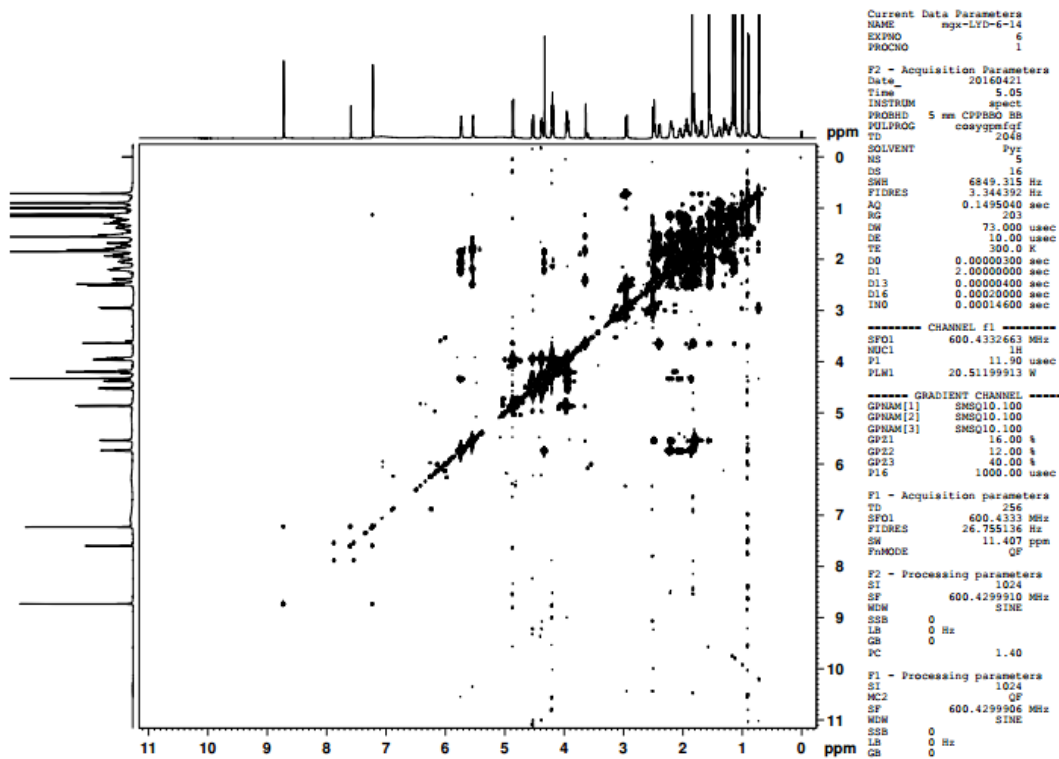

Figure S17.  $^1\text{H}$ - $^1\text{H}$  COSY spectrum of the new compound 3

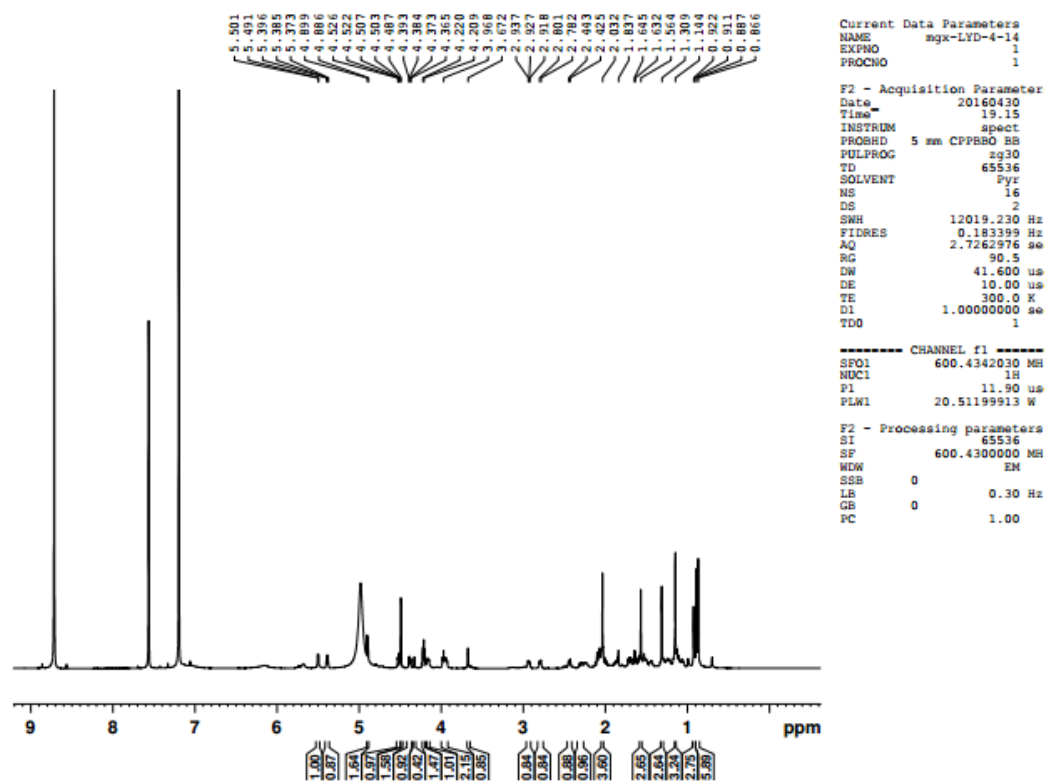

Figure S18.  $^1\text{H}$ -NMR (600 MHz, pyridine- $d_5$ ) spectrum of the new compound **4**

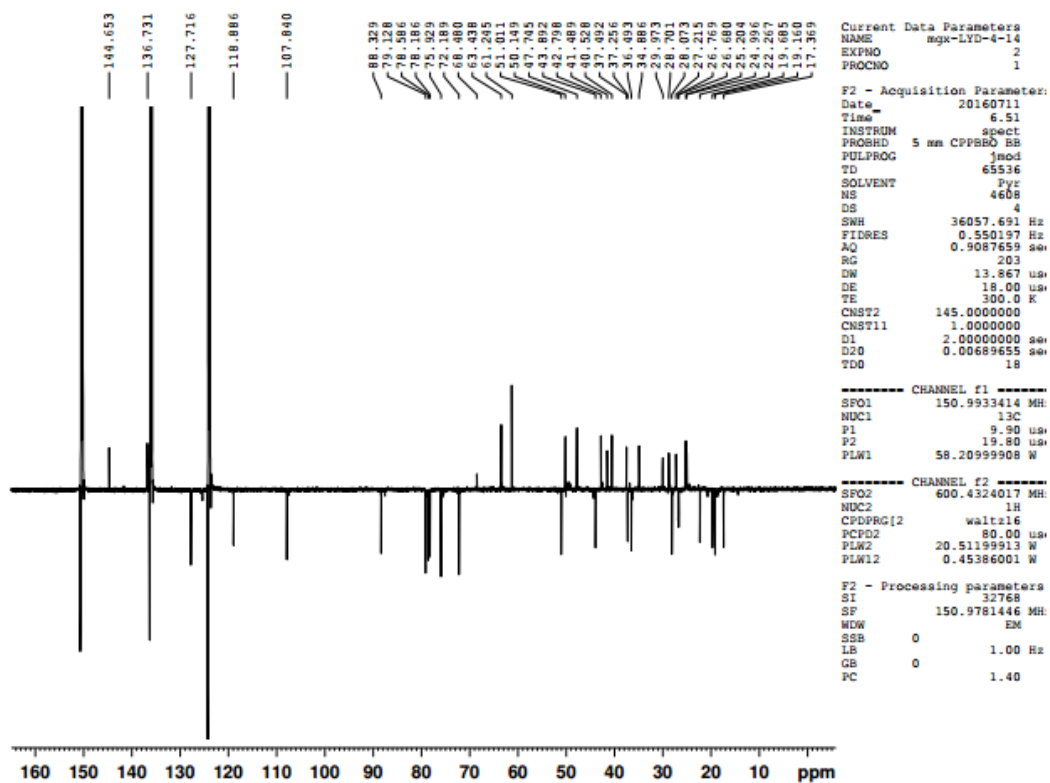

Figure S19.  $^{13}\text{C}$ -APT (150 MHz, pyridine- $d_5$ ) spectrum of the new compound **4**

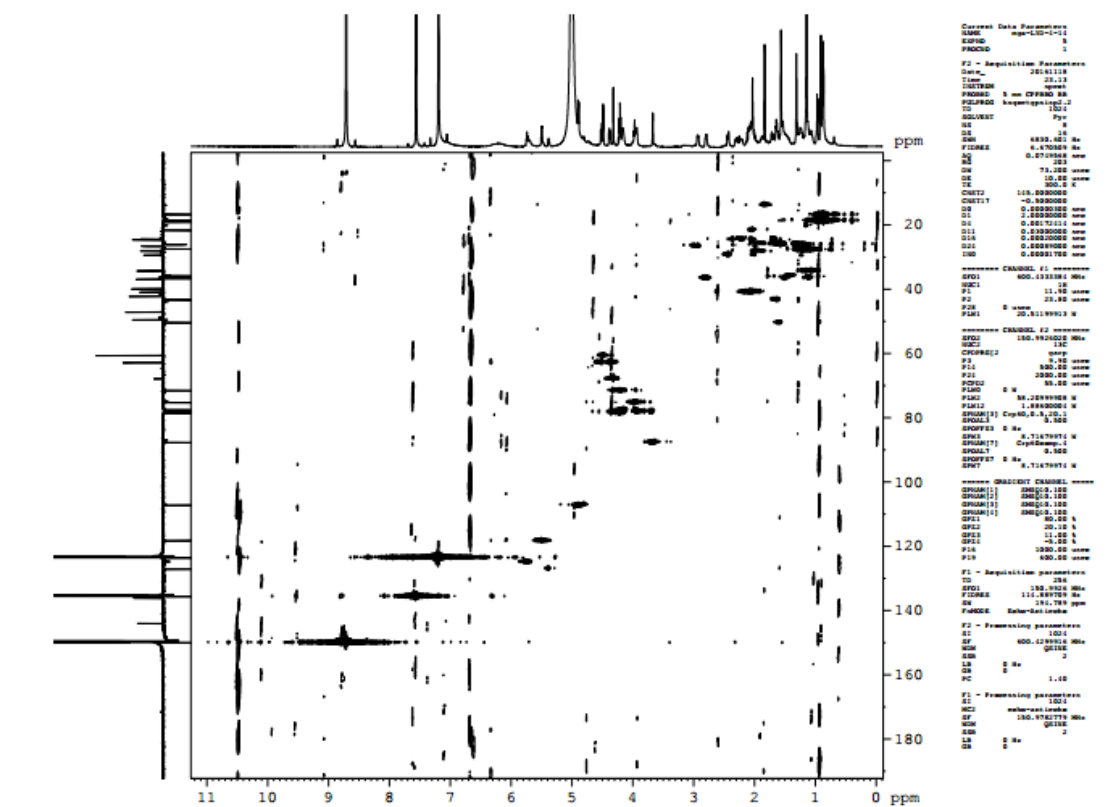

Figure S20. HSQC spectrum of the new compound 4

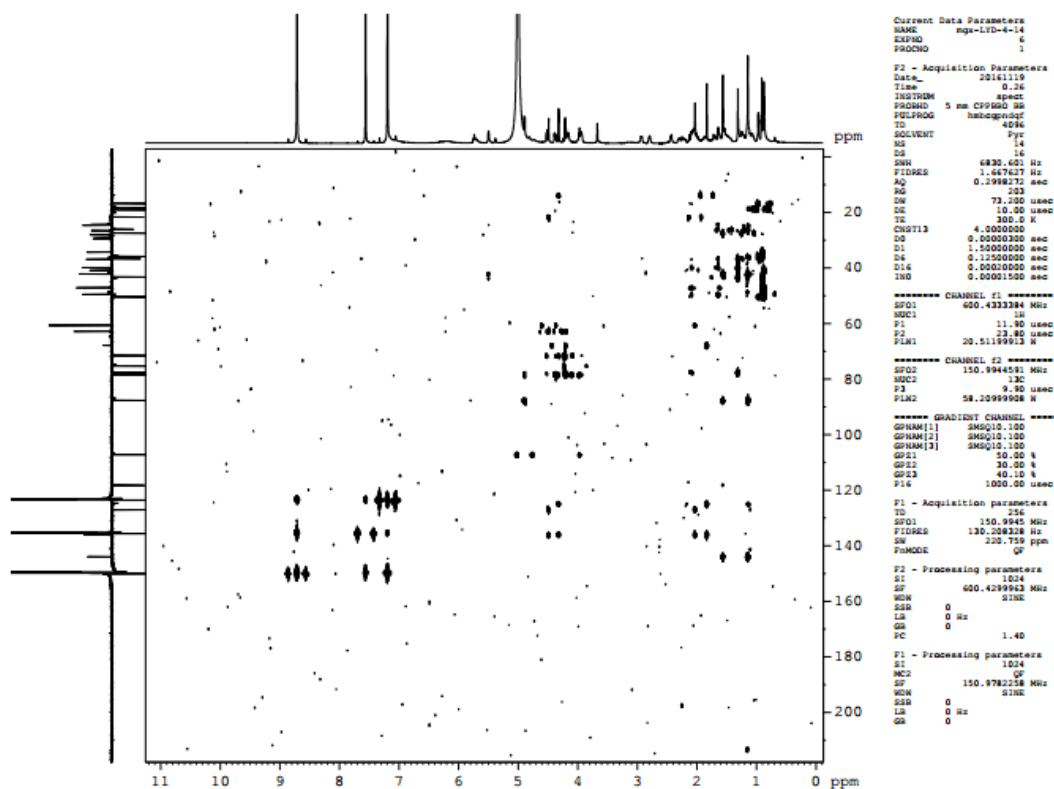

Figure S21. HMBC spectrum of the new compound 4

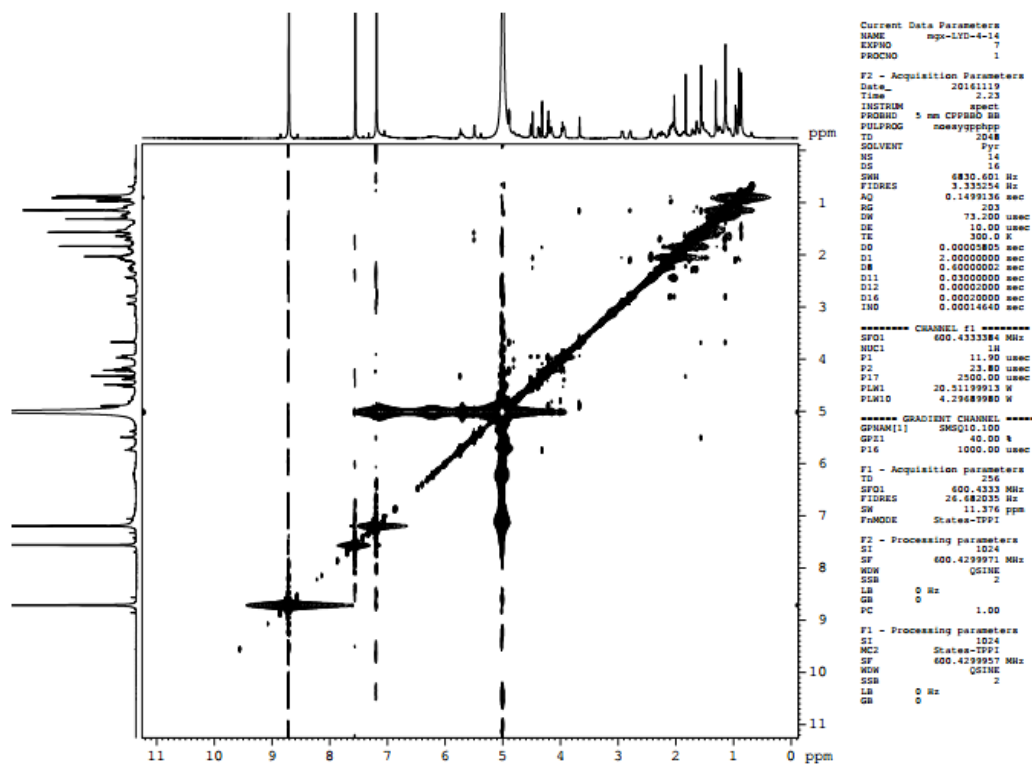

Figure S22. NOESY spectrum of the new compound 4

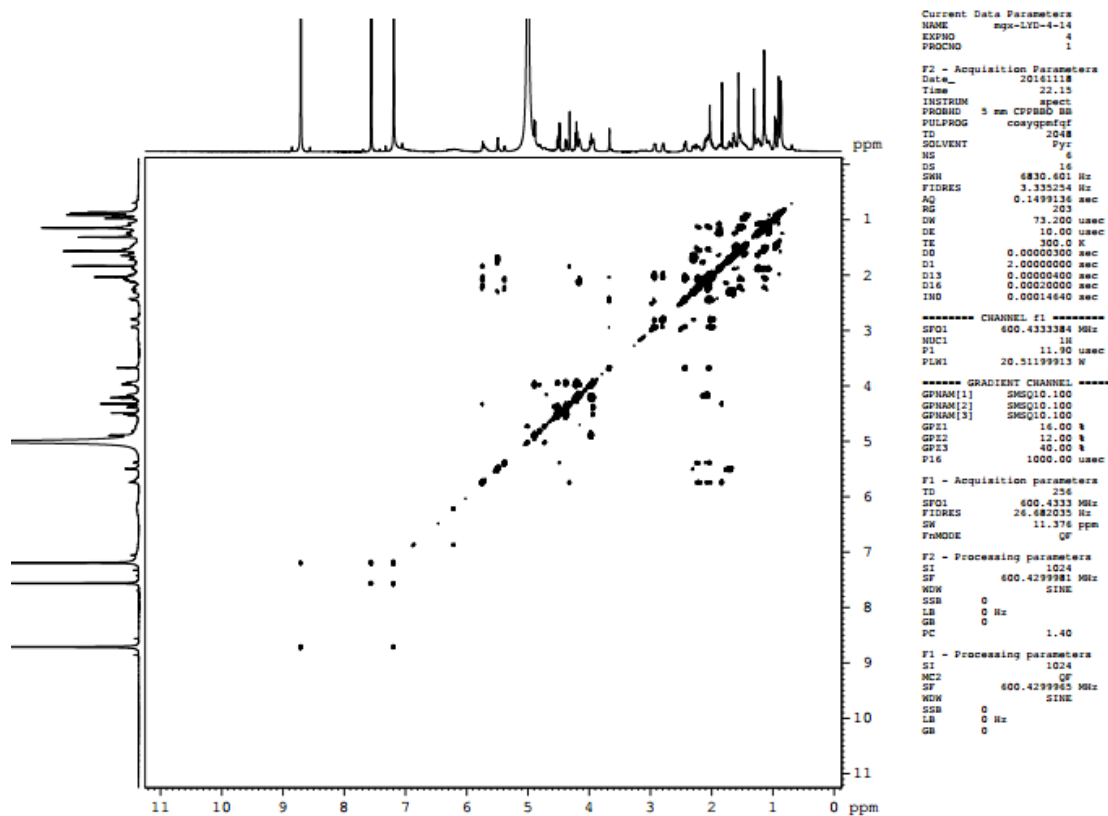

Figure S23.  $^1\text{H}$ - $^1\text{H}$  COSY spectrum of the new compound 4

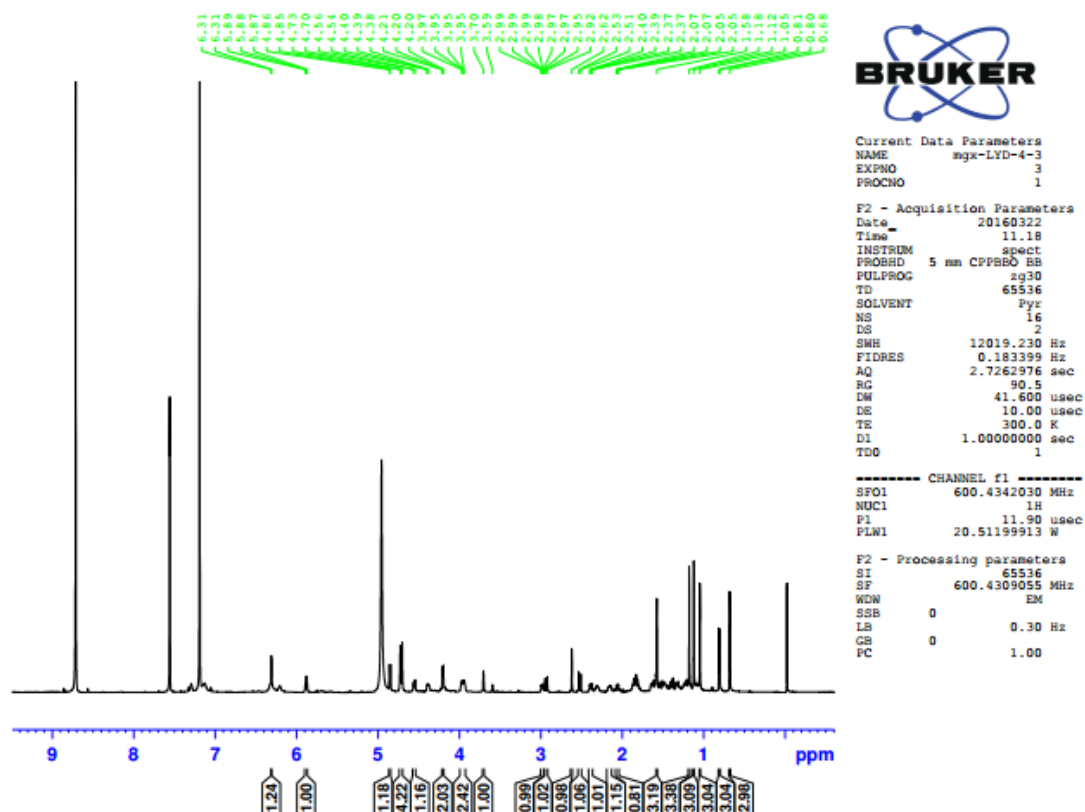

Figure S24.  $^1\text{H}$ -NMR (600 MHz, pyridine- $d_5$ ) spectrum of the new compound 5





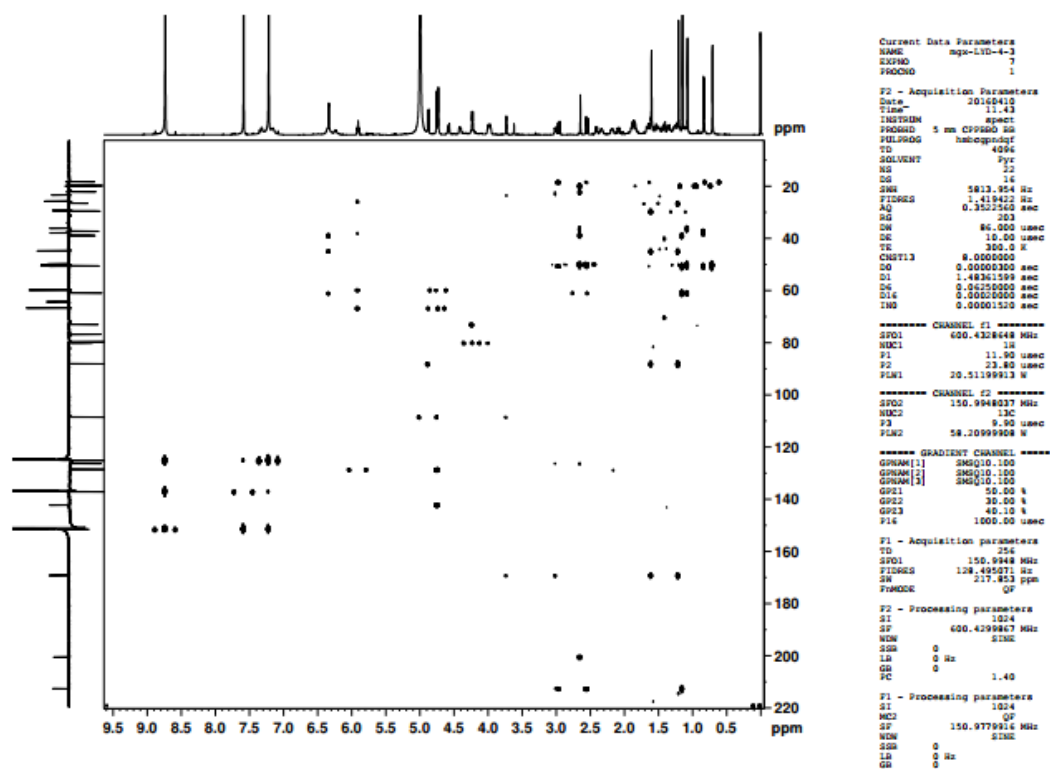

Figure S27. HMBC spectrum of the new compound 5

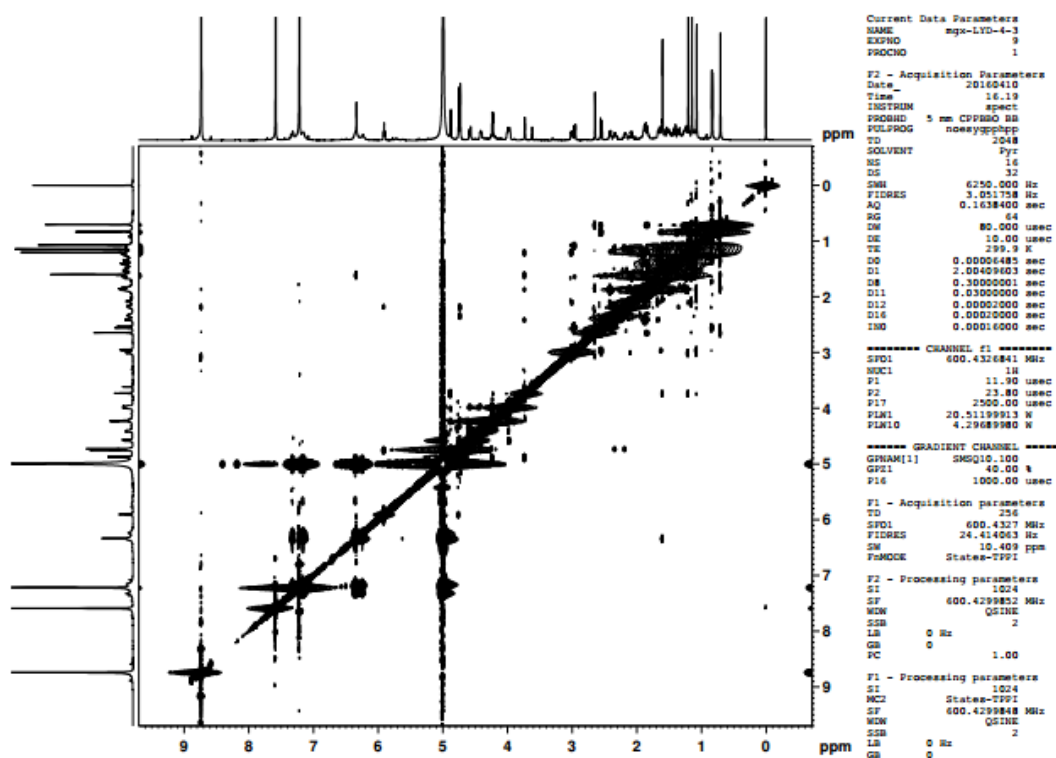

Figure S28. NOESY spectrum of the new compound 5

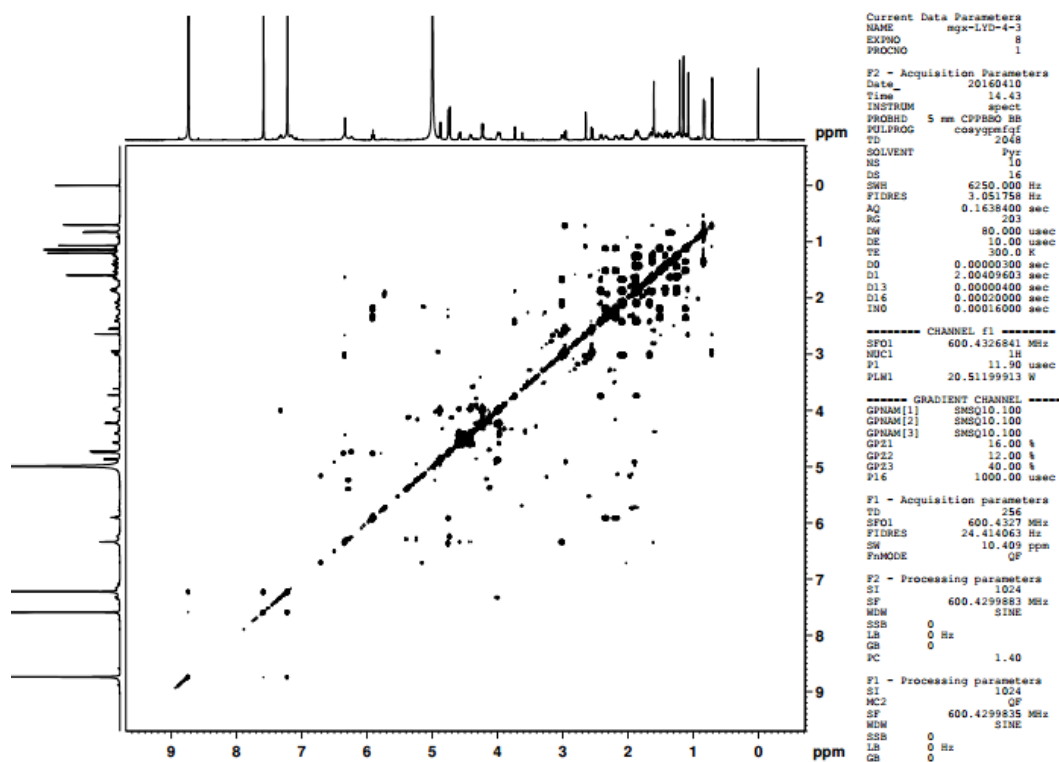

Figure S29.  $^1\text{H}$ - $^1\text{H}$  COSY spectrum of the new compound **5**
